# Supplementary material for: Comparison of Anti-Oxidative Effect of Human Adipose- and Amniotic Membrane-Derived Mesenchymal Stem Cell Conditioned Medium on Mouse Preimplantation Embryo Development
Source: PubMed Central journal article supplement (PMC7916131; doi:10.3390/antiox10020268), 2021-02-09
Supplement: antioxidants-10-00268-s001.pdf [file antioxidants-10-00268-s001.pdf]

Table S1. Analysis of the quantity and quality of the extracted RNA.

| <b>Group</b> | <b>Concentration (ng/ul)</b> | <b>OD 260/280 ratio (nm)</b> |
|--------------|------------------------------|------------------------------|
| Control      | 11.4                         | 2.02                         |
| ASC-CM       | 12.1                         | 1.92                         |
| AMSC-CM      | 13.0                         | 2.01                         |
